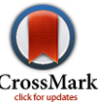

# Hedgehog-PKA Signaling and *gnrh3* Regulate the Development of Zebrafish *gnrh3* Neurons

Ming-Wei Kuo<sup>1,2✉</sup>, Show-Wan Lou<sup>2</sup>, Bon-chu Chung<sup>1\*</sup>

**1** Institute of Molecular Biology, Academia Sinica, Taipei, Taiwan, **2** Institute of Fisheries Science, National Taiwan University, Taipei, Taiwan

## Abstract

GnRH neurons secrete GnRH that controls the development of the reproduction system. Despite many studies, the signals controlling the development of GnRH neurons from its progenitors have not been fully established. To understand the development of GnRH neurons, we examined the development of *gnrh3*-expressing cells using a transgenic zebrafish line that expresses green fluorescent protein (GFP) and LacZ driven by the *gnrh3* promoter. GFP and LacZ expression recapitulated that of *gnrh3* in the olfactory region, olfactory bulb and telencephalon. Depletion of *gnrh3* by morpholinos led to a reduction of GFP- and *gnrh3*-expressing cells, while over-expression of *gnrh3* mRNA increased the number of these cells. This result indicates a positive feed-forward regulation of *gnrh3* cells by *gnrh3*. The *gnrh3* cells were absent in embryos that lack Hedgehog signaling, but their numbers were increased in embryos overexpressing *shhb*. We manipulated the amounts of kinase that antagonizes the Hedgehog signaling pathway, protein kinase A (PKA), by treating embryos with PKA activator forskolin or by injecting mRNAs encoding its constitutively active catalytic subunit (PKA\*) and dominant negative regulatory subunit (PKI) into zebrafish embryos. PKA\* misexpression or forskolin treatment decreased GFP cell numbers, while PKI misexpression led to ectopic production of GFP cells. Our data indicate that the Hedgehog-PKA pathway participates in the development of *gnrh3*-expressing neurons during embryogenesis.

**Citation:** Kuo M-W, Lou S-W, Chung B-c (2014) Hedgehog-PKA Signaling and *gnrh3* Regulate the Development of Zebrafish *gnrh3* Neurons. PLoS ONE 9(5): e95545. doi:10.1371/journal.pone.0095545

**Editor:** Sheng-Ping L. Hwang, Institute of Cellular and Organismic Biology, Taiwan

**Received:** September 5, 2013; **Accepted:** March 28, 2014; **Published:** May 30, 2014

**Copyright:** © 2014 Kuo et al. This is an open-access article distributed under the terms of the Creative Commons Attribution License, which permits unrestricted use, distribution, and reproduction in any medium, provided the original author and source are credited.

**Funding:** This work was supported by grants NSC 102-2923-B-001-003-MY3 from the National Science Council, NHRI-EX102-10210SI from NHRI, and AS-101-TP-B05 from Academia Sinica, Republic of China. The funders had no role in study design, data collection and analysis, decision to publish, or preparation of the manuscript.

**Competing Interests:** The authors have declared that no competing interests exist.

\* E-mail: mbchung@sinica.edu.tw

✉ Current address: Institute of Stem Cells and Translational Cancer Research, Chang Gung Memorial Hospital, Linkou, Taoyuan County, Taiwan

## Introduction

GnRH is a neuropeptide that stimulates the secretion of gonadotropins from the pituitary; it controls reproduction via a neuroendocrine system. Three vertebrate *GnRH* genes are expressed at different brain regions [1]. GnRH1 (LHRH) is primarily found in the hypothalamus, GnRH2 (cGnRH-II) in the midbrain, while GnRH3 (sGnRH) mainly in the terminal nerve of telencephalon [2]. Zebrafish genome lacks *GnRH1*, while human genome lacks *GnRH3*. GnRH2 neurons are expressed in the midbrain from fish to mammals [2]. Deletion of *GnRH1* gene or disruption of the migration of GnRH1-expressing cells results in hypogonadal mouse with reproductive dysfunction [3,4], showing the importance of GnRH1 in the development of reproductive organs. GnRH2 and GnRH3 cells appear to modulate sexual behaviors [5–7].

In vertebrates, while GnRH2 cells are originated locally in the midbrain, GnRH1 and GnRH3 neurons migrate from their origins to the final destinations in the hypothalamus and the terminal nerve, respectively [8]. The neuroendocrine cells originated from adenohypophysis form the future *gnrh1* cells in the hypothalamus, while zebrafish neuromodulatory cells of the neural crest origin form the future *gnrh3* cells in the terminal nerve [8]. GnRH3-producing cells migrate from the olfactory region via terminal nerve into the olfactory bulb and the preoptic

area of the brain in salmon [9–11], medaka [12], barfin flounder [13], European sea bass [14] and zebrafish [15].

It is not clear how *gnrh* progenitor cells differentiate into GnRH neurons, except it is regulated by cues in the nasal midline [16]. In the mouse nasal placode, fibroblast growth factors (FGFs) stimulate the differentiation and axon targeting of GnRH neurons [17]. Blocking FGF signaling in GnRH neurons leads to reduced numbers of GnRH neurons, although the anatomical distribution of GnRH neurons was unaltered [18]. Other factors like retinoic acid, FGF8, Sonic hedgehog (SHH), bone morphogenetic proteins and transcription factor *Lhx2* are also involved in the patterning and differentiation of the olfactory system [19,20].

The Hedgehog (Hh) pathway has been implicated in the development of olfactory neurons. Loss of *Shh* disrupts the axon trajectory of the olfactory receptor neurons [21]. Loss of *Xenopus Xhip*, an Hh-specific antagonist in *Xenopus*, suppresses the formation of olfactory placode, while its overexpression results in a larger olfactory placode [22]. In this report we have examined the development of *gnrh3* neurons *in vivo* by analyzing a *gnrh3-GFP/LacZ* transgenic fish line that we generated. We showed that the development of zebrafish *gnrh3* neurons was regulated by *gnrh* itself and by the Hedgehog-PKA pathway, and FGF signaling may also affect this process.

## Materials and Methods

### Animals

Zebrafish of the AB and TL strains were reared at 28.5°C as described [23]. The protocol for the use of zebrafish was approved by the Academia Sinica Institutional Animal Care and Utilization Committee. The transgene construct was injected into fish of the AB background to generate F0 transgenic fish, which was crossed with wildtype AB strain to generate F1 transgenic fish. These F1 fish were crossed with TL to obtain F2 transgenic fish in the AB/TL background. The F2 transgenic fish were intercrossed, and the homozygous F4 transgenic fish were examined for all experiments reported here. The *smu*<sup>b577</sup> (*slow muscle omitted*, Hh signaling component), *cyc*<sup>b16</sup> (*cyclops*, nodal related), and *oep*<sup>m134</sup> (*one-eyed pinhead*, nodal coreceptor) mutants have been previously described [24–26]. To prevent pigmentation, 0.2 mM phenylthiourea (PTU) was added to the water on day 1 post-fertilization (dpf). PTU treatment did not affect *gnrh3* gene expression as GFP and LacZ staining with or without PTU had the same pattern (Fig. S1 in File S1).

### In situ Hybridization and Immunofluorescence

Whole-mount in situ hybridization was performed using digoxigenin-labeled antisense RNA probes followed by detection with anti-digoxigenin alkaline phosphatase-conjugated antibody as described previously [27]. The *pGEM-T-gnrh3* plasmid was linearized with NcoI before being used as a template for *in vitro* transcription with SP6 RNA polymerase. After *in situ* hybridization, staining and mounting, images were captured with a digital camera (Coolpix 990, Nikon).

For double staining, after *in situ* hybridization, digoxigenin-labeled *gnrh3* antisense RNA probe was first reacted with mouse anti-Digoxin conjugated DyLight 488 (Jackson ImmunoResearch Laboratories, West Grove, PA, USA) followed by immunochemical reaction with rabbit anti-GFP antibody (sc-8334, Santa Cruz, CA, USA) and detection with Alexa Fluor 647-conjugated to donkey anti-rabbit IgG antibody (Invitrogen Corporation, Carlsbad, CA, USA). The signals were observed using a Leica TCS-SP5-MP-SMD confocal system (Leica Microsystems Wetzlar, Wetzlar, Germany).

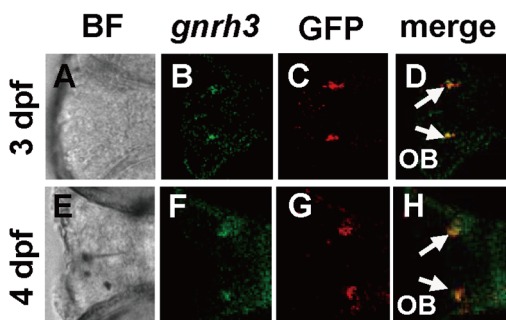

**Figure 1. Co-localization *gnrh3* mRNA and GFP in transgenic fish expressing GFP-LacZ under the control of the *gnrh3* promoter.** A–D, 3 dpf, E–H, 4 dpf. A and E, bright field (BF) view of the embryos. B and F, green color indicated *gnrh3* mRNA detection by *in situ* hybridization. C and G, GFP immunostaining is shown as red signal. D and H, the merged pictures show co-localization of *gnrh3* and GFP signals in the olfactory bulb (OB) at 3 dpf and 4 dpf. The anterior is to the left in all panels, and arrows point to the olfactory bulb. doi:10.1371/journal.pone.0095545.g001

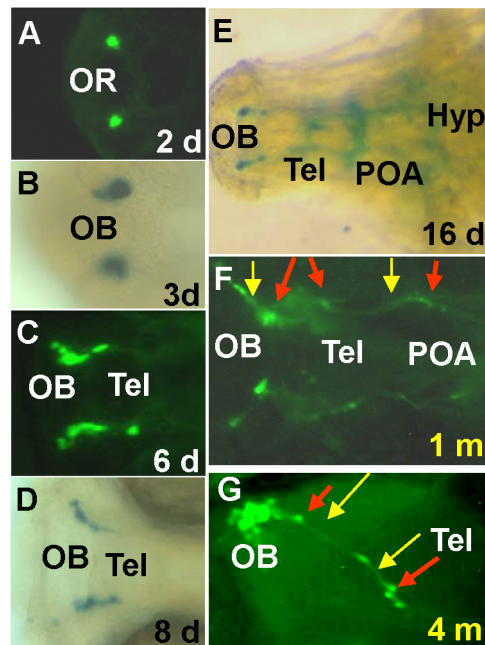

**Figure 2. Detection of GFP- and LacZ-expressing cells in transgenic fish.** A, GFP expression at the olfactory region (OR). B–D, GFP or LacZ cells in the olfactory bulb (OB) and telencephalon (Tel) at 3–8 d (days). E, lacZ cells and axons in the brain at 16 dpf. Hyp, hypothalamus. F–G, At 1 month (m) and 4 months, fluorescent axonal extensions are at OB, Tel and POA (preoptic area). Red arrows indicate cell bodies, yellow arrows indicate axons. A, C, F, G, GFP cells; B, D, E, LacZ-expressing cells. The anterior is towards the left in all panels. A, B, F, G, ventral view; C–E, dorsal view. doi:10.1371/journal.pone.0095545.g002

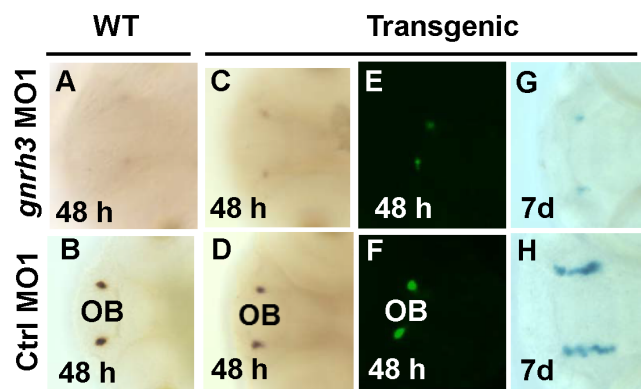

**Figure 3. Depletion of *gnrh3* expression by morpholinos causes reduction of *gnrh3* cells.** A–D, *in situ* hybridization with the *gnrh3* probe. E–F, fluorescence detection of GFP cells. G–H, detection of LacZ-expressing cells. After injection of *gnrh3*-MO1, *gnrh3* and GFP expression was reduced at 48 hpf (A, C and E) and LacZ cells in the forebrain was reduced at 7 dpf (G). B, D, F and H, *Gnrh3* cells neurons after the injection of control sense MO1 (Ctrl-MO1). doi:10.1371/journal.pone.0095545.g003

### *Gnrh3* Gene Cloning, Reporter Gene Constructs and Microinjection

Genomic clones containing the *gnrh3* gene were isolated from a zebrafish BAC genomic DNA library (Incyte Genomic, St. Louis, Missouri) using a *gnrh3* cDNA fragment as the probe. Four clones (81d01, 131o09, 135e16 and 148c10) were analyzed, and clones 135e16 and 148c10 were further subcloned. About a 10-kb region

covering the entire *gnrh3* gene and its 5'- and 3'-flanking regions has been completely sequenced several times. The sequence is the same as that reported in GenBank (accession number AJ304429). To create a zebrafish *gnrh3*-GFP targeting vector, the 2.7-kb fragment containing the *gnrh3* promoter to the ATG and the 2.6-kb fragment containing ATG to *gnrh3* downstream were each ligated into the multiple cloning site of *pChi-GZK* vector (a gift from Dr. Guor-Mour Her) that contains the genes for LacZ and GFP. The final targeting construct, *pChi-gnrh3-GZK*, was about 15 kb (Fig. S2 in File S1). Transgenic zebrafish were generated by microinjection of 50–100 pg *pChi-gnrh3-GZK* DNA into embryos at the one- or two-cell stage. The reporter gene expression was monitored from 24 hpf to 10 dpf using a fluorescence dissecting microscope (MZ-FLIII with GFP 2 filter, Leica). Fluorescence images were captured with a cooling digital camera (SPOT, DIAGNOSTIC instrument, Inc.).

### Morpholino and mRNA Microinjections

Morpholinos of *gnrh3* antisense MO1 (5'-cactccatgctaaactgctgtgt-3'), MO2 (5'-ggaccagcaaccttcttccactc-3'), MO3 (5'-gcaaccttcttccactccatgct-3'), control MO1 (5'-aacacagcagtttagcatggagt-3'), *csnk1a* (5'-ccatgctctaaatccgagaagtac-3'), *gsk3b* (5'-gagtaaaatagctgtgtttgctgt-3'), control MO2 (5'-cctcttaccagttacaattata-3') and *fgfr1* (5'-gcagcagctgtgcttcattatcat-3') (GeneTools, Corvallis, Oregon) were diluted to 10 ng/nl and injected into the yolk of 1-cell embryos at 3–15 ng/injection. Capped RNA was synthesized with mMACHINE T7/SP6 kit (Ambion, Austin, Texas) from linearized plasmids. Full-length *gnrh3* (100 pg) [1], *gnrh2* (100 pg) [1], constitutively active PKA catalytic subunit *PKA\** (50 pg) [28], *PKI* (dominant-negative regulatory subunit of *protein kinase A*, 100 pg) [28], *shha* (2 ng) [29] and *shhb* (*twhh*, 2 ng) [29] mRNA was injected into the yolk of 1-cell embryos, and embryos were allowed to develop at 28.5°C.

### $\beta$ -galactosidase Histochemistry

For the detection of LacZ activity, larvae were fixed with 4% paraformaldehyde in PBS for 5–10 min at 4°C, washed with PBS, and then incubated in 1 mg/ml LacZ substrate, Bluo-gal (5-bromo-indolyl-b-O-galactopyranoside), in reaction buffer (3 mM potassium ferricyanide, 3 mM potassium ferrocyanide, 1.5 mM magnesium sulfate, 0.2% sodium deoxycholate, 0.1% Nonidet P-40, and 0.15 mg/ml chloroquine in PBS) at room temperature overnight or two days [30].

### Drug Treatment

Embryos were soaked in forskolin (200  $\mu$ M, Sigma), cyclopamine (50 or 100  $\mu$ M), tomatidine (100  $\mu$ M in EtOH, Calbiochem), or LiCl (200  $\mu$ M) at 28.5°C from 6 hpf to 10 hpf or indicated otherwise.

### Statistical Analysis

The total number of GFP expressed as means  $\pm$  standard error of the mean (S.E.M.). \* $P$ <0.05, \*\* $P$ <0.01.

## Results

### Transgenic GFP and LacZ Expression can Trace *gnrh3* Neurons

We have generated transgenic fish expressing GFP-LacZ under the control of the *gnrh3* promoter. Antibody staining detected GFP in the olfactory bulb of the transgenic fish, and this GFP expression co-localized with *gnrh3* transcripts both at 3 dpf and 4 dpf (Fig. 1). GFP expression started early at around 1 dpf, and

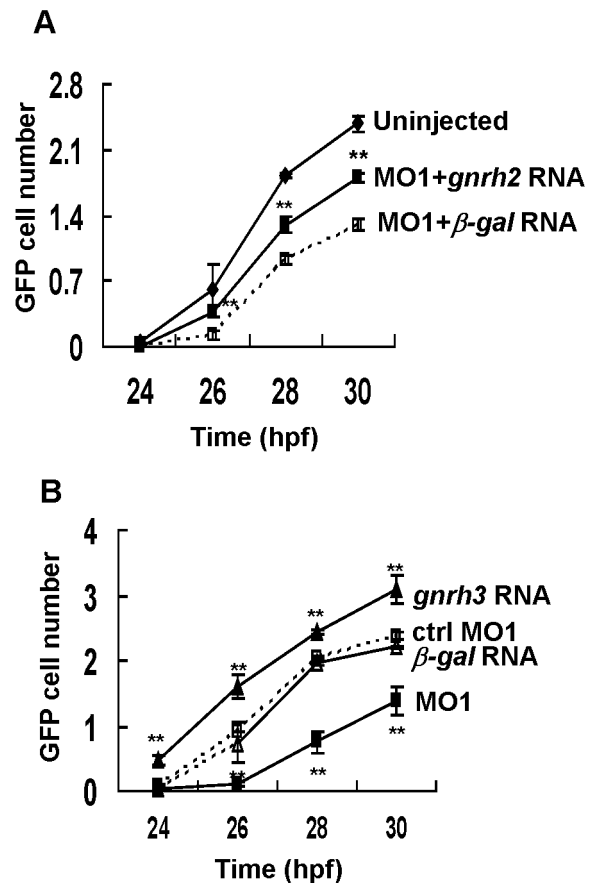

**Figure 4. *Gnrh3* controls the number of *gnrh3* neurons.** *Gnrh3* neurons are detected as GFP expressing cells. A. The number of GFP cells at different time points after the injection of control MO, *gnrh3*-MO1, *gnrh3* RNA, or  $\beta$ -gal RNA. Depletion of *gnrh3* expression by *gnrh3*-MO1 (MO1) reduces the number of GFP cells, and over-expression of *gnrh3* increases GFP cell numbers. B, *gnrh2* mRNA rescues the *gnrh3*-MO1 morphants. Uninjected embryos and embryos injected with control (ctrl-MO1) and  $\beta$ -gal RNA are controls. \* $P$ <0.05. \*\* $P$ <0.01. Twenty embryos were counted for each data point, and the same injection experiments were repeated two to four times for each time point. doi:10.1371/journal.pone.0095545.g004

was evident at 2 days postfertilization (dpf) at the olfactory region (Fig. 2A) and at the olfactory bulb at 3 dpf (Fig. 2B). The expression then extended towards telencephalon (Fig. 2C, D). The GFP/LacZ-expressing neurons were present in the telencephalon and preoptic area at 16 dpf and becoming stronger at 4 months of age (Fig. 2E–G). This GFP expression pattern is similar to those found in other *gnrh3*-GFP transgenic zebrafish [31,32].

### Regulation of *gnrh3* Neurons by *gnrh3*

To understand the role of *gnrh3* in these *gnrh3* neurons, we knocked down *gnrh3* expression in zebrafish with antisense morpholinos (MOs). This led to a decrease of *gnrh3* cells at 48 hpf as detected by *in situ* hybridization (Fig. 3A–D). The expression of GFP fluorescence in transgenic fish that express *gnrh3*:GFP-LacZ was also decreased (Fig. 3E, F). At day 7, LacZ-expressing *gnrh3* cells were detected in control-MO1-injected larvae (Fig. 3H), but were missing after *gnrh3*-MO1 injection (Fig. 3G). In addition to *gnrh3*-MO1, a different morpholino, *gnrh3*-MO2, was also injected into zebrafish embryos, and 60% of the embryos had decreased *gnrh3*-expressing cells at 2 dpf. Similarly,

**Table 1.** Aberrant *gnrh3* neuron numbers in embryos with perturbed Hh signaling pathways.

| Mutants or treatment    | % embryos with decreased <i>gnrh3</i> expression after incross | Hh manipulation                      | % embryos with ectopic GFP expression | % embryos with ectopic <i>gnrh3</i> expression |
|-------------------------|----------------------------------------------------------------|--------------------------------------|---------------------------------------|------------------------------------------------|
| oep                     | 21% (n = 95)                                                   | <i>PKI</i>                           | 9% (n = 34)                           | 11% (n = 45)                                   |
| oep+ <i>PKI</i>         | 2% (n = 108)                                                   | <i>PKI</i> + <i>gsk3b</i> -MO        | 29% (n = 38)                          | 29% (n = 34)                                   |
| <i>cyc</i>              | 24% (n = 127)                                                  | <i>PKI</i> + <i>csnk1a</i> -MO       | 26% (n = 31)                          | 31% (n = 35)                                   |
| <i>cyc</i> + <i>PKI</i> | 1% (n = 126)                                                   | <i>gsk3b</i> -MO                     | 0% (n = 30)                           | 0%                                             |
| <i>smu</i>              | 27% (n = 59)                                                   | <i>csnk1a</i> -MO                    | 0% (n = 30)                           | 0%                                             |
|                         |                                                                | <i>gsk3b</i> -MO + <i>csnk1a</i> -MO | 0% (n = 30)                           | 0%                                             |

Embryos from heterozygote mating were examined for *gnrh3* expression and the numbers of embryos were scored. Alternatively embryos from wildtype parents were injected with morpholinos or mRNAs before scoring ectopic GFP and *gnrh3* expression at 2 dpf.

doi:10.1371/journal.pone.0095545.t001

*gnrh3*-MO3 resulted in a decrease of *gnrh3*-expressing cells in 30% of the embryos at 2 dpf. Therefore all three independent *gnrh3*-MO sequences led to reduced presence of *gnrh3* cells.

To rule out off-target effects of *gnrh3*-MOs, we added *gnrh* transcripts back to zebrafish embryos to see whether this can rescue the defect in *gnrh3* morphants. Because the *gnrh3*-MOs can bind *gnrh3* mRNA and destroy *gnrh3* mRNA, we rescued

morphants with *gnrh2* mRNA because *gnrh2* mRNA is resistant to *gnrh3*-MO1 and *gnrh2* can also bind to *gnrh* receptors. After injection of *gnrh2* mRNA into fertilized eggs, *gnrh2* was mis-expressed in all parts of zebrafish embryos and partially rescued the defect of GFP cells caused by *gnrh3*-MO1 (Fig. 4A). Injection of a control  $\beta$ -gal mRNA together with *gnrh3*-MO1, however, still led

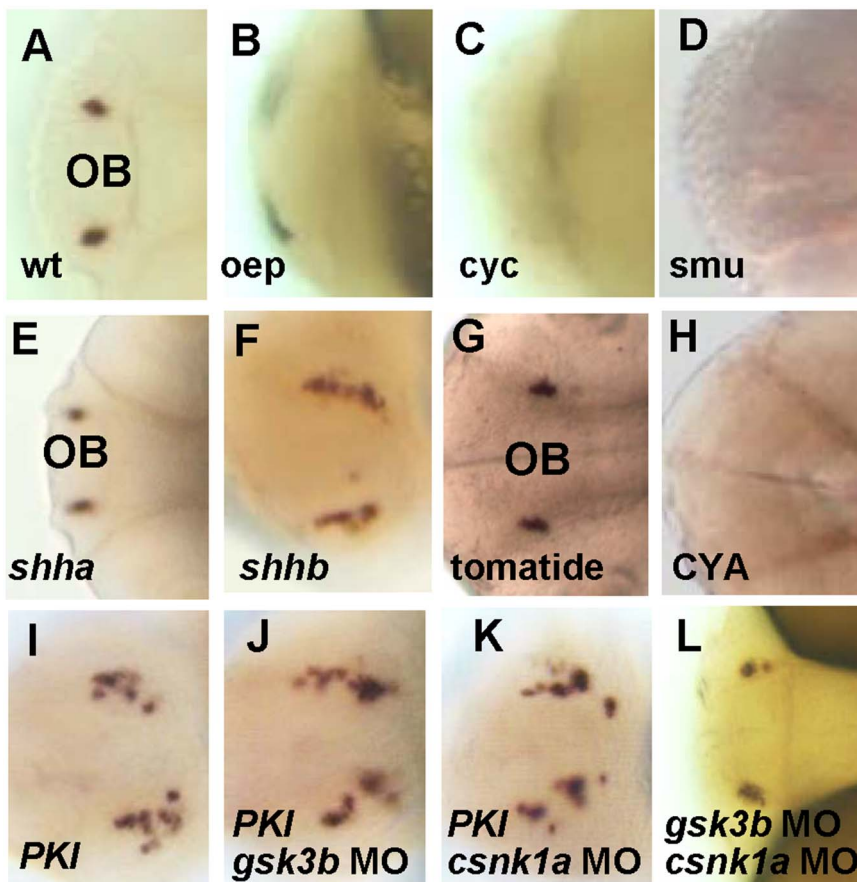

**Figure 5. Hh-*PKA* pathway is required for the development of *gnrh3* neurons.** All embryos are at 2 dpf. **A–D**, *gnrh3* neurons were detected by *in situ* hybridization with the *gnrh3* probe in the wildtype (wt), but not in *oep*, *cyc* and *smu* mutants. **E–F**, Ectopic GFP expression near the olfactory region in embryos injected with (F) *shhb*, but not (E) *shha* mRNA. **G–H**, *gnrh3* signals were normal in control (G) tomatide-treated embryos, but were lost in embryos treated with (H) Hh inhibitor cyclopamine (CYA, 100  $\mu$ M) at 6–10 hpf. **I–K**, More ectopic *gnrh3*-expressing cells were detected after co-injection of *gsk3b*-MO or *csnk1a*-MO with *PKI* mRNA. **L**, *Gsk3b* and *csnk1a* double MO treatment did not increase the number of ectopic *gnrh3*-expressing cells. The anterior is to the left in all panels.

doi:10.1371/journal.pone.0095545.g005



**Table 2.** Aberrant numbers of *gnrh3* neurons in embryos treated with different chemicals.

| Treatment            | Treatment Time | % <i>gnrh3</i> <sup>+</sup> embryos | % embryos with ectopic <i>gnrh3</i> expression |
|----------------------|----------------|-------------------------------------|------------------------------------------------|
| Cyclopamine (100 μM) | 6–8 hpf        | 45% (n = 42)                        | 0%                                             |
|                      | 6–10 hpf       | 0% (n = 126)                        | 0%                                             |
|                      | 6–24 hpf       | 0% (n = 49)                         | 0%                                             |
| Cyclopamine (50 μM)  | 6–8 hpf        | 93% (n = 54)                        | 0%                                             |
|                      | 6–10 hpf       | 13% (n = 32)                        | 0%                                             |
|                      | 6–24 hpf       | 0% (n = 28)                         | 0%                                             |
| Tomatidine (100 μM)  | 6–10 hpf       | 100% (n = 84)                       | 0%                                             |
|                      | 6–24 hpf       | 100% (n = 31)                       | 0%                                             |
| LiCl (200 μM)        | 6–7 hpf        | 50% (n = 37)                        | 0%                                             |
|                      | 6–8 hpf        | 0% (n = 51)                         | 0%                                             |
|                      | 7–8 hpf        | 100% (n = 29)                       | 0%                                             |
|                      | 6–10 hpf       | 0% (n = 38)                         | 0%                                             |
|                      | 7–9 hpf        | 62% (n = 13)                        | 0%                                             |
|                      | 8–10 hpf       | 100% (n = 43)                       | 0%                                             |
|                      | 8–12 hpf       | 100% (n = 42)                       | 50%                                            |
|                      | 8–24 hpf       | 100% (n = 28)                       | 100%                                           |
|                      | 10–24 hpf      | 100% (n = 41)                       | 0%                                             |

Embryos were treated with drugs for different time periods, and the numbers of embryos that expressed *gnrh3* were scored.

doi:10.1371/journal.pone.0095545.t002

to a reduction of GFP cells. This result indicated that *gnrh* has a role in the proliferation of *gnrh3*-expressing cells.

We also investigated the effect of *gnrh3* overexpression on the expansion of *gnrh3* cells. After *gnrh3* mRNA microinjection, GFP cells appeared earlier and their cell numbers increased faster than those in the control fish injected with control  $\beta$ -gal RNA (Fig. 4B). These data indicated that *gnrh3* was important for the differentiation and proliferation of *gnrh3*-expressing neurons.

### Regulation of *gnrh3* Neurons by the Hedgehog-PKA Pathway

We further investigated the developmental control of *gnrh3* neurons by screening existing mutants for defective *gnrh3* expression. Expression of *gnrh3* was not detected in about a quarter of offspring from the crosses of *oep*, *cyc*, and *smu* heterozygous parents (Fig. 5A–D). The scoring of these mutants followed a Mendelian ratio (Table 1), indicating that these mutants affect something linked to the appearance of the *gnrh3* cells. The *oep* and *cyc* mutants do not possess ventral forebrain and thus lose *shh* expression [24,25], while *smu* is defective in Hh signaling [26]. We therefore examined the participation of Hh signaling in more detail.

When *shha* (*sonic hedgehog a*, *syn*) mRNA was injected into zebrafish embryos, the pattern of *gnrh3* was the same as that found in wildtype embryos (Fig. 5E). However, when *shhb* (*sonic hedgehog b*) was misexpressed in zebrafish embryos, increased numbers of ectopic GFP cells were detected (Fig. 5F). Conversely, when fish embryos were incubated with Hh pathway blocker cyclopamine (CYA) from 6–10 hpf, the number of *gnrh3* neurons was decreased, while incubation with control chemical tomatidine had no effect (Fig. 5G–H, Table 2). These gain- and loss-of function studies indicate the participation of *shhb* signaling in the development of *gnrh3* neurons.

To dissect the involvement of Hh signaling pathway in *gnrh3* cell development, we further examined the participation of kinases

that antagonize the Hh pathway. In *Drosophila*, the Hh signaling is blocked by three kinases, PKA, CK1 and GSK3b [33]. In zebrafish the Hh signaling is also antagonized by the PKA pathway, which can be inhibited by a dominant-negative regulatory subunit of *protein kinase A* (PKI) [28]. Blocking PKA function by PKI caused ectopic *gnrh3* expression in about 10% embryos (Fig. 5I and statistics at Table 1). Co-injection of PKI mRNA and *gsk3b*-MO also increased the number of cells that express *gnrh3* ectopically (Fig. 5J). Similarly co-injection of MO against *csnk1a* (zebrafish *CK1* orthologue) with PKI mRNA also increased ectopic *gnrh3* expression (Fig. 5K), and the population of embryos with increased *gnrh3* expression increased to about 30% (Table 1). Injection of *gsk3b*-MO and *csnk1a*-MO, alone or together, however, did not cause ectopic *gnrh3* expression (Fig. 5L, Table 1). Blocking GSK3b activity by LiCl at 6–8 hpf or 6–10 hpf completely blocked *gnrh3* expression, but LiCl treatment at 8–12 hpf or 8–24 hpf caused ectopic *gnrh3* expression (Table 2), implying that GSK3b affects the differentiation of *gnrh3* neurons differently at different developmental stages. These data suggest the PKA, CK1 and GSK3b pathways regulate the development of *gnrh3* neuronal progenitors.

To further examine the effect of PKA signaling on *gnrh3* expression, we increased PKA activity by injected into fish embryos mRNA for the constitutively active catalytic subunit of PKA (PKA\*). This led to a decrease of GFP- and LacZ-expressing cells at 30 hpf (Fig. 6). PKI mRNA (100 pg /embryo) injection, on the contrary, increased the number of ectopic GFP- and LacZ-expressing cells. High concentrations of PKA activator forskolin (200 μM) decreased the number of GFP/LacZ/*gnrh3* cells (Fig. 6). PKI mRNA microinjection also partially rescued *gnrh3* cells in embryos treated with forskolin treatment (Fig. 6) or in *oep* and *cyc* mutant (Fig. S3 in File S1).

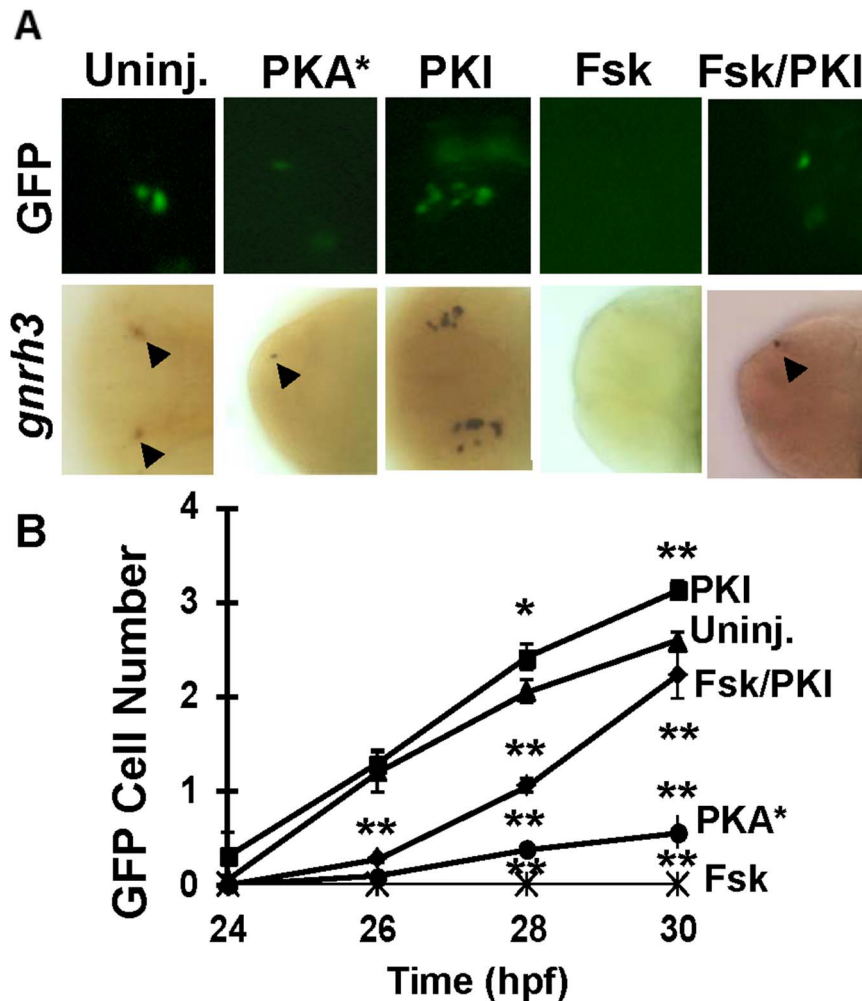

**Figure 6. PKA pathway antagonizes the development of *gnrh3* neurons at 30 hpf.** **A**, GFP- (top) or *gnrh3*-expressing (bottom) cells in embryos injected with mRNA for constitutively active subunit of PKA (PKA\*), PKI, or treated with forskolin (Fsk) or PKI + forskolin. The anterior is to the left in all panels. **B**, Quantitation of the numbers of GFP-expressing neurons. Twenty embryos were counted for each data point. \* $P < 0.05$ . \*\* $P < 0.01$ . doi:10.1371/journal.pone.0095545.g006

### Effect of Fgf Pathway in the Development of *gnrh3* Neurons

We also tested Fgf pathway in *gnrh3* neuron development by *fgfr1*-MO microinjection. The *fgfr1*-MO treatment caused a decrease in the number of *gnrh3* neurons, whereas control-MO2 had no effect (Fig. 7). This result suggests that the Fgf pathway may be involved in *gnrh3* neuron development.

### Discussion

In this paper, we generated GFP-LacZ transgenic fish that express GFP and LacZ in *gnrh3*-expressing cells. This fish line was used to analyze the development of *gnrh3* neurons. We showed that the differentiation and proliferation of these cells were controlled by *gnrh3* itself and by the Hh-PKA signaling pathway.

We showed the effect of the Hedgehog-PKA pathway in the development of *gnrh3*-expressing cells by inhibitor treatment, analysis of fish mutants, morpholino knockdown, and mRNA overexpression experiments. Hedgehog signaling regulates the patterning of craniofacial neural crest cells [34], which will become *gnrh3* progenitors located adjacent to the olfactory placode [8]. The Hedgehog signaling may regulate the patterning

and the spatial distribution of GnRH3 neurons by influencing neural crest cell migration and/or differentiation. The effect of hedgehog signaling on *gnrh3* cell fate, however, is not that simple. Zebrafish has two *shh* genes, *shha* and *shhb*. While *shhb* mRNA misexpression led to ectopic *gnrh3* progenitor cells, *shha* misexpression had no such effect. This data indicates that the functions of these two genes are not identical, and *shhb* seems to be more instructive than *shha* in directing *gnrh3* cell expansion. Detailed functions of the Hh pathway in zebrafish still need to be examined in the future.

Multiple signaling molecules appear to be involved in the differentiation of *gnrh3* neurons. We found blocking of FGF pathway led to a reduction of *gnrh3* cells. Furthermore, misexpression of constitutively active PKA\* prevented the expansion of *gnrh3*-expressing cells from their progenitors. Blocking PKA by PKI or PKI together with *gsk3b/ensk1a* morpholinos increased ectopic expression of *gnrh3* neurons. GSK3b inhibitor, LiCl, abolished or caused ectopic *gnrh3* expression in the zebrafish at different developmental states (Table 2). GSK3b and CK1 also participate in the Wnt pathway [35]; it is possible that WNT pathway may also regulate the development of *gnrh3* neurons.

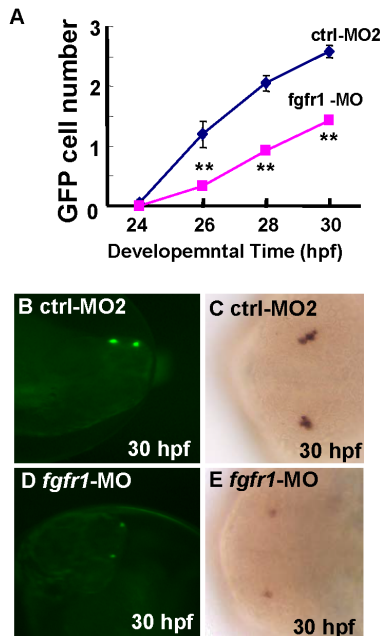

**Figure 7. Requirement of Fgf pathway in the development of *gnrh3* neurons.** **A**, Decreased GFP cell numbers after injection of *fgfr1*-MO as compared with embryos injected with control MO2 (ctrl-MO2). **B–E**, Decreased *gnrh3*-expressing cells as detected by (B, D) GFP or (C, E) *in situ* hybridization. The anterior is to the left in all panels. Twenty embryos were counted for each data point. \*\* $P < 0.01$ . doi:10.1371/journal.pone.0095545.g007

Several signaling molecules including BMP, FGF, Wnt, and Hh are expressed in the neural plate close to the preplacodal field or in primordial sensory organs close to the cranial placode [36]. Individually or in combination, these molecules are candidates that may induce the formation of cranial preplacode, as well as of individual cranial placodes [37–39]. Detailed functions of Hh or

## References

- Kuo MW, Lou SW, Postlethwait J, Chung BC (2005) Chromosomal organization, evolutionary relationship, and expression of zebrafish GnRH family members. *J Biomed Sci* 12: 629–639.
- Whitlock KE (2005) Origin and development of GnRH neurons. *Trends Endocrinol Metab* 16: 145–151.
- Mason AJ, Hayflick JS, Zoeller RT, Young WS 3rd, Phillips HS, et al. (1986) A deletion truncating the gonadotropin-releasing hormone gene is responsible for hypogonadism in the hpg mouse. *Science* 234: 1366–1371.
- Schwanzel-Fukuda M, Bick D, Pfaff DW (1989) Luteinizing hormone-releasing hormone (LHRH)-expressing cells do not migrate normally in an inherited hypogonadism (Kallmann) syndrome. *Brain Res Mol Brain Res* 6: 311–326.
- Ogawa S, Akiyama G, Kato S, Soga T, Sakuma Y, et al. (2006) Immunoneutralization of gonadotropin-releasing hormone type-III suppresses male reproductive behavior of cichlids. *Neurosci Lett* 403: 201–205.
- Uchida H, Ogawa S, Harada M, Matsumita M, Iwata M, et al. (2005) The olfactory organ modulates gonadotropin-releasing hormone types and nest-building behavior in the tilapia *Oreochromis niloticus*. *J Neurobiol* 65: 1–11.
- Barnett DK, Bunnell TM, Millar RP, Abbott DH (2006) Gonadotropin-releasing hormone II stimulates female sexual behavior in marmoset monkeys. *Endocrinology* 147: 615–623.
- Whitlock KE, Wolf CD, Boyce ML (2003) Gonadotropin-releasing hormone (*gnrh*) cells arise from cranial neural crest and adenohypophyseal regions of the neural plate in the zebrafish, *danio rerio*. *Dev Biol* 257: 140–152.
- Amano M, Oka Y, Kitamura S, Ikuta K, Aida K (1998) Ontogenic development of salmon GnRH and chicken GnRH-II systems in the brain of masu salmon (*Oncorhynchus masou*). *Cell Tissue Res* 293: 427–434.
- Chiba A, Oka S, Honma Y (1994) Ontogenetic development of gonadotropin-releasing hormone-like immunoreactive neurons in the brain of the chum salmon, *Oncorhynchus keta*. *Neurosci Lett* 178: 51–54.
- Parhar IS, Iwata M, Pfaff DW, Schwanzel-Fukuda M (1995) Embryonic development of gonadotropin-releasing hormone neurons in the sockeye salmon. *J Comp Neurol* 362: 256–270.

other signaling pathways in *gnrh3* neurons still need to be examined in the future.

In this report we show that *gnrh3* is important for the development of *gnrh3* neurons, as depletion of *gnrh3* causes reduction of *gnrh3* cell numbers in zebrafish. *Gnrh3* is important for the migration, fiber development and pathfinding of *gnrh3* neurons [15]. It is also important for the maintenance of *gnrh3* neurons [40]. We have blocked *gnrh3* expression by morpholinos since fertilization and shown the importance of *gnrh3* in the expansion of *gnrh3* neurons at 24–30 hpf. Thus, *gnrh3* is important for both the proliferation and the maintenance of *gnrh3* neurons. GnRH secreted by olfactory neuroblast cell line FNC-B4 also acts in an autocrine manner to promote the differentiation and migration of GnRH-secreting neurons [41]. These data indicate the conserved autocrine role of GnRH for the development of GnRH neuron system.

## Supporting Information

**File S1 Contains Figures S1, S2, and S3.** Figure S1. Similar patterns between *LacZ* staining and GFP signals at different stages. Figure S2. Structure of the *gnrh3* mRNA, its gene, and the design of plasmid to generate transgenic fish expressing *GFP-LacZ* under the control of the *gnrh3* promoter. Figure S3. PKI rescue the *gnrh3* neurons in *oep* or *cyc* mutants at 30 hpf. **A**, Examination of *gnrh3* cell numbers in *PKI*-injected *oep* mutant. **B**, Examination of *gnrh3* cell numbers in *PKI*-injected *cyc* mutant. (DOCX)

## Acknowledgments

We thank Guor Mour Her for the plasmids.

## Author Contributions

Conceived and designed the experiments: MWK SWL BcC. Performed the experiments: MWK. Analyzed the data: MWK BcC. Contributed reagents/materials/analysis tools: MWK BcC. Wrote the paper: MWK BcC.

- Okubo K, Sakai F, Lau EL, Yoshizaki G, Takeuchi Y, et al. (2006) Forebrain gonadotropin-releasing hormone neuronal development: insights from transgenic medaka and the relevance to X-linked Kallmann syndrome. *Endocrinology* 147: 1076–1084.
- Amano M, Okubo K, Yamanome T, Oka Y, Kawaguchi N, et al. (2004) Ontogenic development of three GnRH systems in the brain of a pleuronectiform fish, barfin flounder. *Zool J Linn Soc* 21: 311–317.
- Gonzalez-Martinez D, Zmora N, Zanuy S, Sarasquete C, Elizur A, et al. (2002) Developmental expression of three different pre-GnRH (gonadotropin-releasing hormone) messengers in the brain of the European sea bass (*Dicentrarchus labrax*). *J Chem Neuroanat* 23: 255–267.
- Abraham E, Palevitch O, Ijiri S, Du SJ, Gothilf Y, et al. (2008) Early Development of Forebrain Gonadotropin-Releasing Hormone (GnRH) Neurons and the Role of GnRH as an Autocrine Migration Factor. *Journal of Neuroendocrinology* 20: 394–405.
- Kramer PR, Wray S (2000) Midline nasal tissue influences nestin expression in nasal-placode-derived luteinizing hormone-releasing hormone neurons during development. *Dev Biol* 227: 343–357.
- Gill JC, Moenter SM, Tsai PS (2004) Developmental regulation of gonadotropin-releasing hormone neurons by fibroblast growth factor signaling. *Endocrinology* 145: 3830–3839.
- Tsai PS, Moenter SM, Postigo HR, El Majdoubi M, Pak TR, et al. (2005) Targeted expression of a dominant-negative fibroblast growth factor (FGF) receptor in gonadotropin-releasing hormone (GnRH) neurons reduces FGF responsiveness and the size of GnRH neuronal population. *Mol Endocrinol* 19: 225–236.
- LaMantia AS, Bhasin N, Rhodes K, Heemskerk J (2000) Mesenchymal/epithelial induction mediates olfactory pathway formation. *Neuron* 28: 411–425.
- Berghard A, Hagglund AC, Bohm S, Carlsson L (2012) Lhx2-dependent specification of olfactory sensory neurons is required for successful integration of olfactory, vomeronasal, and GnRH neurons. *FASEB J* 26: 3464–3472.

21. Balmer CW, LaMantia AS (2004) Loss of *Gli3* and *Shh* function disrupts olfactory axon trajectories. *J Comp Neurol* 472: 292–307.
22. Cornesse Y, Pieler T, Hollemann T (2005) Olfactory and lens placode formation is controlled by the hedgehog-interacting protein (*Xhip*) in *Xenopus*. *Dev Biol* 277: 296–315.
23. Westerfield M (1995) *The Zebrafish Book: A Guide for the Laboratory Use of Zebrafish (Danio rerio)*. Eugene: Univ. of Oregon Press.
24. Schier AF, Neuhauss SC, Helde KA, Talbot WS, Driever W (1997) The one-eyed pinhead gene functions in mesoderm and endoderm formation in zebrafish and interacts with *no tail*. *Development* 124: 327–342.
25. Sampath K, Rubinstein AL, Cheng AM, Liang JO, Fekany K, et al. (1998) Induction of the zebrafish ventral brain and floorplate requires *cyclops/nodal* signalling. *Nature* 395: 185–189.
26. Barresi MJ, Stickney HL, Devoto SH (2000) The zebrafish slow-muscle-omitted gene product is required for Hedgehog signal transduction and the development of slow muscle identity. *Development* 127: 2189–2199.
27. Tong SK, Chiang EF, Hsiao PH, Chung B (2001) Phylogeny, expression and enzyme activity of zebrafish *cyp19* (P450 aromatase) genes. *J Steroid Biochem Mol Biol* 79: 299–303.
28. Hammerschmidt M, Bitgood MJ, McMahon AP (1996) Protein kinase A is a common negative regulator of Hedgehog signaling in the vertebrate embryo. *Genes Dev* 10: 647–658.
29. Meng A, Moore B, Tang H, Yuan B, Lin S (1999) A *Drosophila* doublesex-related gene, *terra*, is involved in somitogenesis in vertebrates. *Development* 126: 1259–1268.
30. Aguzzi A, Theuring F (1994) Improved in situ beta-galactosidase staining for histological analysis of transgenic mice. *Histochemistry* 102: 477–481.
31. Palevitch O, Abraham E, Borodovsky N, Levkowitz G, Zohar Y, et al. (2010) *Cxcl12a-Cxcr4b* signaling is important for proper development of the forebrain GnRH system in zebrafish. *Gen Comp Endocrinol* 165: 262–268.
32. Ramakrishnan S, Lee W, Navarre S, Kozlowski DJ, Wayne NL (2010) Acquisition of spontaneous electrical activity during embryonic development of gonadotropin-releasing hormone-3 neurons located in the terminal nerve of transgenic zebrafish (*Danio rerio*). *Gen Comp Endocrinol* 168: 401–407.
33. Zhang W, Zhao Y, Tong C, Wang G, Wang B, et al. (2005) Hedgehog-regulated Costal2-kinase complexes control phosphorylation and proteolytic processing of *Cubitus interruptus*. *Dev Cell* 8: 267–278.
34. Ahlgren SC, Bronner-Fraser M (1999) Inhibition of sonic hedgehog signaling in vivo results in craniofacial neural crest cell death. *Curr Biol* 9: 1304–1314.
35. Doble BW, Woodgett JR (2003) GSK-3: tricks of the trade for a multi-tasking kinase. *J Cell Sci* 116: 1175–1186.
36. Toro S, Varga ZM (2007) Equivalent progenitor cells in the zebrafish anterior preplacodal field give rise to adenohypophysis, lens, and olfactory placodes. *Semin Cell Dev Biol* 18: 534–542.
37. Schlosser G (2006) Induction and specification of cranial placodes. *Dev Biol* 294: 303–351.
38. Streit A (2004) Early development of the cranial sensory nervous system: from a common field to individual placodes. *Dev Biol* 276: 1–15.
39. Litsiou A, Hanson S, Streit A (2005) A balance of FGF, BMP and WNT signalling positions the future placode territory in the head. *Development* 132: 4051–4062.
40. Abraham E, Palevitch O, Gothilf Y, Zohar Y (2010) Targeted gonadotropin-releasing hormone-3 neuron ablation in zebrafish: effects on neurogenesis, neuronal migration, and reproduction. *Endocrinology* 151: 332–340.
41. Romanelli RG, Barni T, Maggi M, Luconi M, Failli P, et al. (2004) Expression and function of gonadotropin-releasing hormone (GnRH) receptor in human olfactory GnRH-secreting neurons: an autocrine GnRH loop underlies neuronal migration. *J Biol Chem* 279: 117–126.
